# Supplementary material
Source: PubMed Central journal article supplement (PMC7687921)
Supplement: NIHMS1590663-supplement-Supplemental_Digital_Content_2.pdf [file NIHMS1590663-supplement-Supplemental_Digital_Content_2.pdf]

## Supplemental Digital Content 2: Measures of reasons for not using, not being interested in, or stopping PrEP<sup>a</sup>

---

What are the reasons you are not taking PrEP? (check all that apply)

- I am at low risk for HIV and don't need PrEP
- I don't know enough about PrEP
- I don't know where or how to get PrEP
- PrEP is too expensive / it is not covered by my insurance
- I don't want to talk to a doctor or other health care provider about my sex life
- I think I would have trouble taking it consistently
- I am concerned about side-effects
- I am concerned that if I become HIV-positive while taking PrEP, certain anti-HIV medicines won't work
- I am concerned about stigma or judgment if people knew I was taking PrEP
- Other (please specify): \_\_\_\_\_
- I prefer not to answer

What are the reasons you are not interested in PrEP? (check all that apply)

- I am at low risk for HIV and don't need PrEP
- I don't know enough about PrEP
- I don't know where or how to get PrEP
- PrEP is too expensive / it is not covered by my insurance
- I don't want to talk to a doctor or other health care provider about my sex life
- I think I would have trouble taking it consistently
- I am concerned about side-effects
- I am concerned that if I become HIV-positive while taking PrEP, certain anti-HIV medicines won't work
- I am concerned about stigma or judgment if people knew I was taking PrEP
- Other (please specify): \_\_\_\_\_
- I prefer not to answer

Why did you stop taking PrEP? (check all that apply)

- I tested positive for HIV
- I felt that I was not longer at high risk of getting HIV
- I moved away from the doctor/provider who prescribed my PrEP
- I couldn't afford to keep paying for PrEP / I lost my insurance
- I had trouble taking the pills every day
- I had trouble coming in for appointments every 3 months
- I didn't like how I felt when I took it
- I was concerned about the long-term health effects of PrEP
- I was concerned that if I became HIV-positive while taking PrEP, certain anti-HIV medicines wouldn't work
- I felt that I was judged or treated badly for taking it
- I was no longer motivated to use PrEP

- Other (please specify): \_\_\_\_\_
- I prefer not to answer

---

*<sup>a</sup>The response options for these questions were randomized to reduce reporting bias*
