# Supplementary material
Source: PubMed Central journal article supplement (PMC7687921)
Supplement: NIHMS1590663-supplement-Supplemental_Digital_Content_3.pdf [file NIHMS1590663-supplement-Supplemental_Digital_Content_3.pdf]

### Supplemental Digital Content 3: Map of the regions of Washington State defined for survey analysis

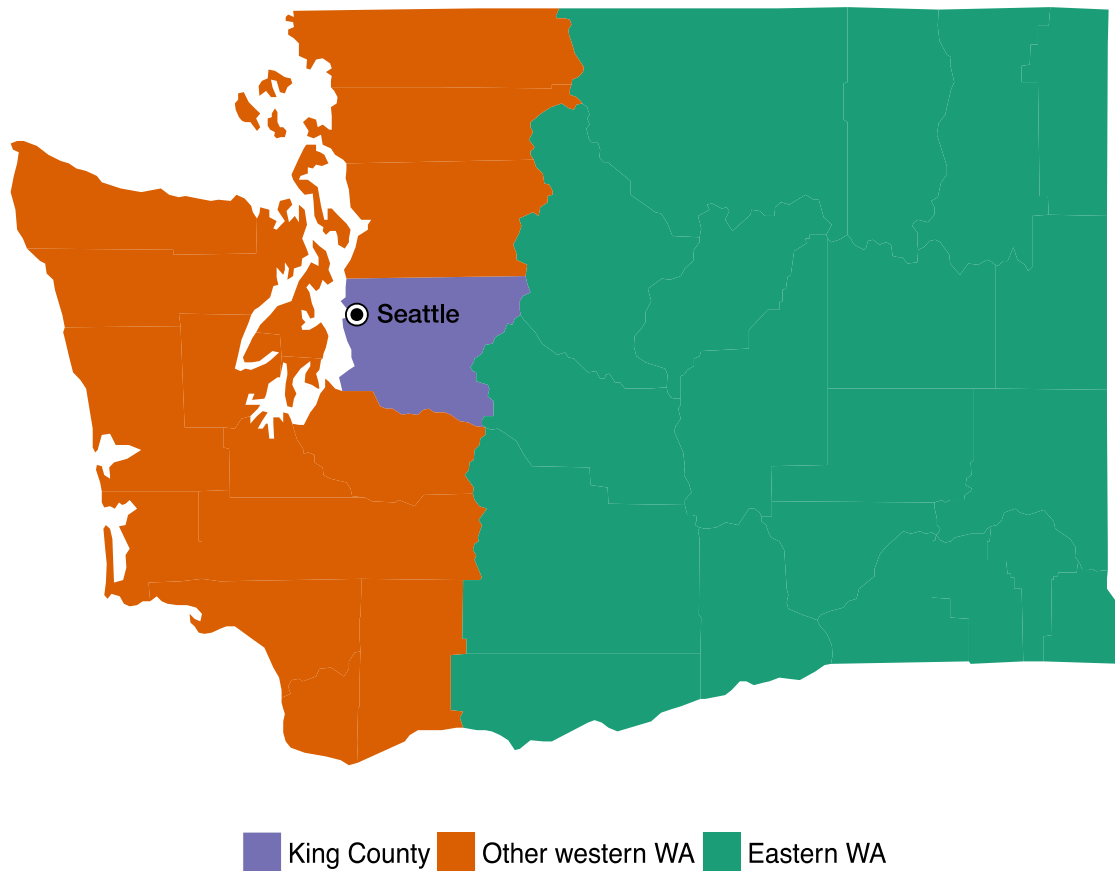

King County is home to an estimated 55% of the state's MSM population<sup>1</sup> and 59% of prevalent MSM HIV/AIDS cases.<sup>2</sup>

---

Figure created using the 'maps'<sup>3</sup> and 'ggplot2'<sup>4</sup> packages in R version 3.4.2.<sup>5</sup>

1. Grey J. MSM Estimation State Profiles: Emory Coalition for Applied Modeling for Prevention (CAMP); Available from: <http://www.emorycamp.org/item.php?i=50>.
2. Washington State Department of Health, Infectious Disease Assessment Unit. HIV surveillance data, based on case information reported through 11/30/17. 2018.
3. Becker RA, Wilks AR, Brownrigg R, et al. maps: Draw Geographical Maps. R Package version 3.3.0; 2018.
4. Wickam H. ggplot2: Elegant Graphics for Data Analysis. New York: Springer-Verlag; 2016.
5. R Core Team. R: A Language and Environment for Statistical Computing. Vienna, Austria: R Foundation for Statistical Computing; 2017.
